# Supplementary material
Source: PubMed Central journal article supplement (PMC5902790)
Supplement: id7b00195_si_001.pdf [file id7b00195_si_001.pdf]

## Supporting Information Cover Sheet

Supporting Information Table S1. Database of the *Anopheles darlingi* feedings on *Plasmodium vivax* donors in the Peruvian Amazon.

One Table, Table S1, 6 pages

Continuous Supply of *Plasmodium vivax* Sporozoites from Colonized *Anopheles darlingi* in the Peruvian Amazon

Marta Moreno, Carlos Tong-Rios, Pamela Orjuela-Sanchez, Gabriel Carrasco-Escobar, Brice Campo, Dionicia Gamboa, Elizabeth A. Winzeler, Joseph M. Vinetz

**Table S1. Database of the *Anopheles darlingi* feedings on *Plasmodium vivax* donors in the Peruvian Amazon**

| Assay code | Gametocytemia<br>(gametocytes/ $\mu$ l) | Parasitemia<br>(asexual stages/ $\mu$ l) | Oocyst<br>Prevalence | Mean oocyst<br>count |
|------------|-----------------------------------------|------------------------------------------|----------------------|----------------------|
| MMV01      | 156                                     | 2728                                     | 46.15                | 1.3                  |
| MMV04      | 510                                     | 5700                                     | 68                   | 17.3                 |
| MMV05      | 1164                                    | 17194                                    | 62.5                 | 1.5                  |
| MMV06      | 5820                                    | 16080                                    | 82.3                 | 8                    |
| MMV07      | 2790                                    | 2760                                     | 86.7                 | 57.5                 |
| MMV08      | 1560                                    | 17820                                    | 88.2                 | 34.8                 |
| MMV09      | 39                                      | 5754                                     | 91.3                 | 38.8                 |
| MMV11      | 45                                      | 16722                                    | 25.7                 | 13.29                |
| MMV12      | 78                                      | 5048                                     | 86.7                 | 22.5                 |
| MMV14      | 4800                                    | 120                                      | 95.8                 | 9.88                 |
| MMV22      | 564                                     | 4099                                     | 83                   | 31.8                 |
| MMV23      | 1104                                    | 507                                      | 90                   | 8.7                  |
| MMV24      | 1588                                    | 352                                      | 98.1                 | 48                   |
| MMV25      | 2246                                    | 20630                                    | 100                  | 72.4                 |
| MMV26      | 620                                     | 4315                                     | 99.1                 | 56                   |
| MMV32      | 2078                                    | 14810                                    | 62.9                 | 34.2                 |
| MMV33      | 3606                                    | 3060                                     | 69.4                 | 56.5                 |
| MMV34      | 118                                     | 186                                      | 34.2                 | 1.4                  |
| MMV35      | 540                                     | 5970                                     | 90                   | 1.8                  |
| MMV36      | 330                                     | 2280                                     | 55                   | 1.2                  |
| MMV37      | 300                                     | 2910                                     | 94.4                 | 14.1                 |
| MMV38      | 1140                                    | 8220                                     | 83                   | 27                   |
| MMV39      | 360                                     | 840                                      | 66.7                 | 8.2                  |
| MMV40      | 330                                     | 4320                                     | 65                   | 6.5                  |
| MMV41      | 510                                     | 2880                                     | 90                   | 15.4                 |
| MMV42      | 390                                     | 3390                                     | 100                  | 19.2                 |
| MMV43      | 360                                     | 3750                                     | 100                  | 25.2                 |
| MMV44      | 360                                     | 2760                                     | 95.2                 | 39.1                 |
| MMV45      | 750                                     | 5640                                     | 100                  | 39.5                 |
| MMV46      | 84                                      | 2350                                     | 40                   | 10.1                 |
| MMV47      | 510                                     | 1080                                     | 100                  | 25.5                 |

|       |      |       |     |       |
|-------|------|-------|-----|-------|
| MMV48 | 1761 | 13970 | 100 | 66.3  |
| MMV49 | 71   | 1336  | 30  | 3.2   |
| MMV51 | 750  | 5580  | 50  | 2.1   |
| MMV53 | 3240 | 14460 | 100 | 10.3  |
| MMV54 | 1230 | 8040  | 100 | 8.5   |
| MMV55 | 840  | 14070 | 70  | 13.5  |
| MMV56 | 2460 | 48480 | 100 | 25.6  |
| MMV57 | 1440 | 13440 | 60  | 11.2  |
| MMV58 | 360  | 1860  | 100 | 17    |
| MMV59 | 18   | 23    | 50  | 2.6   |
| MMV60 | 360  | 2670  | 50  | 6.2   |
| MMV61 | 2070 | 8430  | 100 | 39.8  |
| MMV62 | 72   | 2783  | 50  | 13.8  |
| MMV63 | 232  | 1734  | 100 | 45    |
| MMV64 | 531  | 1023  | 90  | 30.8  |
| MMV65 | 1440 | 7560  | 100 | 133.4 |
| MMV66 | 60   | 3030  | 60  | 4.4   |
| MMV67 | 144  | 2820  | 90  | 20.3  |
| MMV68 | 1069 | 3742  | 100 | 15.7  |
| MMV69 | 300  | 6895  | 50  | 5.2   |
| MMV70 | 3330 | 18360 | 100 | 89.4  |
| MMV71 | 358  | 6656  | 90  | 24.6  |
| MMV72 | 510  | 1396  | 70  | 13.4  |
| MMV73 | 358  | 5850  | 80  | 6.7   |
| MMV74 | 47   | 2541  | 30  | 3.6   |
| MMV75 | 360  | 1860  | 60  | 9.4   |
| MMV76 | 360  | 10920 | 70  | 8.3   |
| MMV77 | 750  | 6120  | 80  | 11.3  |
| MMV78 | 360  | 1470  | 80  | 11.2  |
| MMV79 | 630  | 1800  | 90  | 16.1  |
| MMV81 | 537  | 10756 | 80  | 8.2   |
| MMV82 | 26   | 48    | 40  | 0.5   |
| MMV83 | 510  | 10560 | 70  | 6.4   |
| MMV84 | 388  | 1314  | 80  | 5.3   |
| MMV86 | 330  | 360   | 70  | 3.3   |
| MMV87 | 1020 | 4470  | 100 | 12    |

|        |      |        |     |      |
|--------|------|--------|-----|------|
| MMV88  | 24   | 1140   | 30  | 0.8  |
| MMV89  | 390  | 4860   | 70  | 4.7  |
| MMV90  | 1680 | 3750   | 100 | 24.2 |
| MMV91  | 108  | 6179   | 60  | 3.1  |
| MMV92  | 132  | 1590   | 50  | 2.8  |
| MMV93  | 510  | 9600   | 70  | 7.2  |
| MMV94  | 960  | 19200  | 90  | 11.3 |
| MMV95  | 95   | 626    | 70  | 4.7  |
| MMV96  | 1590 | 9480   | 90  | 14.3 |
| MMV97  | 420  | 6030   | 50  | 2.7  |
| MMV98  | 480  | 6120   | 60  | 3    |
| MMV99  | 120  | 3120   | 30  | 0.8  |
| MMV100 | 3840 | 112344 | 100 | 16.4 |
| MMV101 | 388  | 1910   | 60  | 3.7  |
| MMV102 | 72   | 4020   | 40  | 1.4  |
| MMV103 | 182  | 5420   | 60  | 2.6  |
| MMV105 | 432  | 6245   | 70  | 5.3  |
| MMV106 | 320  | 1923   | 40  | 0.3  |
| MMV107 | 125  | 6208   | 40  | 0.5  |
| MMV108 | 383  | 3002   | 60  | 1.1  |
| MMV109 | 1538 | 8766   | 100 | 10.2 |
| MMV110 | 346  | 1834   | 60  | 2.2  |
| MMV111 | 685  | 5239   | 70  | 6.3  |
| MMV112 | 823  | 4264   | 70  | 6.4  |
| MMV113 | 124  | 6232   | 30  | 0.4  |
| MMV114 | 203  | 1247   | 30  | 0.1  |
| MMV115 | 450  | 3880   | 50  | 0.5  |
| MMV116 | 960  | 12480  | 70  | 5.3  |
| MMV117 | 76   | 3480   | 30  | 0.2  |
| MMV121 | 660  | 3320   | 60  | 2.1  |
| MMV122 | 2910 | 18720  | 100 | 7.7  |
| MMV123 | 48   | 2328   | 30  | 0.3  |
| MMV124 | 626  | 3432   | 50  | 1.6  |
| MMV125 | 600  | 12720  | 100 | 14.6 |
| MMV126 | 96   | 3360   | 20  | 0.2  |
| MMV127 | 330  | 1860   | 60  | 4.1  |

|         |      |        |     |       |
|---------|------|--------|-----|-------|
| MMV128  | 810  | 8220   | 100 | 21.9  |
| MMV129  | 24   | 84     | 43  | 1.1   |
| MMV130  | 690  | 1470   | 75  | 10.3  |
| MMV131  | 330  | 6240   | 60  | 5.2   |
| MMV133  | 330  | 3780   | 50  | 0.5   |
| MMV134  | 305  | 4241   | 100 | 142   |
| MMV135  | 1080 | 4920   | 30  | 0.4   |
| MMV136  | 24   | 108    | 50  | 1.3   |
| MMV137  | 1770 | 19980  | 100 | 30.8  |
| MMV138  | 475  | 4170   | 70  | 5.7   |
| MMV139  | 3920 | 21267  | 139 | 2.3   |
| MMV140  | 477  | 2358   | 140 | 1.1   |
| MMV 141 | 794  | 3000   | 70  | 10.6  |
| MMV 142 | 3044 | 84,420 | 100 | 15.6  |
| MMV 143 | 669  | 4922   | 70  | 3.8   |
| MMV 144 | 895  | 4029   | 100 | 6.3   |
| MMV145  | 579  | 1768   | 100 | 3.4   |
| MMV146  | 887  | 2958   | 100 | 8.8   |
| MMV147  | 376  | 1884   | 40  | 0.8   |
| MMV148  | 2881 | 8019   | 100 | 266.3 |
| MMV149  | 1866 | 1292   | 100 | 44.3  |
| MMV150  | 59   | 119    | 30  | 0.3   |
| MMV151  | 1205 | 976    | 90  | 12.4  |
| MMV152  | 1891 | 2807   | 100 | 194   |
| MMV153  | 95   | 702    | 80  | 62.4  |
| MMV154  | 1641 | 11611  | 70  | 12    |
| MMV155  | 60   | 477    | 20  | 0.4   |
| MMV156  | 1004 | 3724   | 90  | 15.6  |
| MMV157  | 360  | 2310   | 40  | 0.4   |
| MMV158  | 630  | 2700   | 100 | 88    |
| MMV159  | 1862 | 13123  | 100 | 136   |
| MMV160  | 125  | 746    | 30  | 0.3   |
| MMV161  | 1770 | 13980  | 100 | 257.3 |
| MMV162  | 812  | 5507   | 100 | 123.8 |
| MMV163  | 7590 | 43014  | 100 | 326.4 |
| MMV164  | 333  | 1543   | 60  | 18.6  |

|        |      |       |       |       |
|--------|------|-------|-------|-------|
| MMV165 | 2885 | 4342  | 100   | 396   |
| MMV166 | 1537 | 3439  | 100   | 387   |
| MMV167 | 861  | 3933  | 100   | 362   |
| MMV167 | 861  | 3933  | 100   | 362   |
| MMV168 | 621  | 2896  | 100   | 247   |
| MMV169 | 519  | 2596  | 100   | 268   |
| MMV170 | 896  | 4537  | 100   | 68    |
| MMV171 | 2512 | 5172  | 100   | 145   |
| MMV172 | 597  | 1791  | 70    | 36    |
| MMV173 | 1158 | 5343  | 100   | 48.4  |
| MMV174 | 832  | 13515 | 100   | 73.25 |
| MMV175 | 96   | 156   | 88.88 | 90.3  |
| MMV176 | 119  | 976   | 95    | 90.3  |
| MMV177 | 2500 | 3000  | 100   | 136   |
| MMV178 | 721  | 1731  | 90    | 77    |
| MMV179 | 551  | 2986  | 80    | 4     |
| MMV180 | 1419 | 6502  | 100   | 126   |
| MMV181 | 3190 | 6239  | 100   | 149   |
| MMV183 | 418  | 657   | 20    | 3     |
| MMV184 | 287  | 716   | 40    | 7     |
| MMV185 | 4328 | 29403 | 100   | 58.4  |
| MMV186 | 6000 | 4990  | 100   | 127.7 |
| MMV187 | 1432 | 8896  | 90    | 11.2  |
| MMV188 | 1343 | 4925  | 100   | 46.6  |
| MMV189 | 653  | 3772  | 90    | 6.8   |
| MMV190 | 466  | 4340  | 80    | 6.3   |
| MMV191 | 236  | 824   | 70    | 8.4   |
| MMV192 | 465  | 1896  | 80    | 14.2  |
| MMV193 | 466  | 4340  | 70    | 8.3   |
| MMV194 | 115  | 808   | 40    | 0.9   |
| MMV195 | 414  | 1891  | 70    | 10.2  |
| MMV196 | 84   | 626   | 20    | 0.3   |
| MMV197 | 1515 | 35822 | 70    | 12.3  |
| MMV198 | 689  | 919   | 90    | 36.6  |

|        |      |       |     |       |
|--------|------|-------|-----|-------|
| MMV199 | 384  | 3103  | 70  | 12.8  |
| MMV200 | 384  | 1241  | 80  | 26    |
| MMV201 | 1902 | 8371  | 100 | 214   |
| MMV202 | 384  | 1241  | 80  | 1.6   |
| MMV203 | 927  | 6725  | 100 | 23.5  |
| MMV204 | 802  | 3000  | 80  | 9.4   |
| MMV205 | 396  | 1240  | 80  | 16.6  |
| MMV206 | 358  | 836   | 90  | 14.2  |
| MMV207 | 2525 | 4010  | 100 | 46.3  |
| MMV208 | 746  | 3445  | 70  | 84.6  |
| MMV209 | 436  | 4542  | 70  | 19.4  |
| MMV210 | 746  | 1194  | 80  | 32.4  |
| MMV211 | 1433 | 11672 | 100 | 63.2  |
| MMV212 | 3030 | 12238 | 100 | 189.8 |
| MMV213 | 588  | 6471  | 100 | 46.4  |
| MMV214 | 1492 | 1170  | 10  | 60    |
| MMV216 | 1791 | 3284  | 80  | 62.4  |
| MMV217 | 1045 | 9014  | 90  | 41.6  |
| MMV218 | 632  | 4880  | 70  | 35    |
| MMV219 | 2495 | 5198  | 100 | 92.7  |
| MMV220 | 4332 | 1697  | 100 | 45.3  |
| MMV221 | 3970 | 5294  | 100 | 93.2  |
| MMV222 | 142  | 12624 | 60  | 23.5  |
| MMV223 | 980  | 7218  | 100 | 33.43 |
| MMV224 | 2418 | 13493 | 30  | 0.3   |
| MMV225 | 683  | 3950  | 89  | 3.26  |
| MMV226 | 537  | 2627  | 40  | 2.6   |
| MMV227 | 448  | 3701  | 100 | 105   |
